## Epicardial adipose tissue and atrial fibrillation: guilty as charged or guilty by association?

J. Sousa<sup>1</sup>, D. Matos<sup>2</sup>, A. Ferreira<sup>2</sup>, J. Abecasis<sup>2</sup>, C. Saraiva<sup>3</sup>, P. Freitas<sup>2</sup>, J. Carmo<sup>2</sup>, S. Carvalho<sup>2</sup>, G. Rodrigues<sup>2</sup>, A. Durazzo<sup>2</sup>, F.M. Costa<sup>2</sup>, P. Carmo<sup>2</sup>, F. Morgado<sup>2</sup>, D. Cavaco<sup>2</sup>, P. Adragao<sup>2</sup>

<sup>1</sup>Hospital Dr. Nélio Mendonça, Cardiology, Funchal, Portugal; <sup>2</sup>Hospital de Santa Cruz, Cardiology, Lisbon, Portugal; <sup>3</sup>Hospital de Santa Cruz, Radiology, Lisbon, Portugal

**Funding Acknowledgement:** Type of funding source: None

**Background:** Epicardial adipose tissue (EAT) has been linked to the presence and burden of atrial fibrillation (AF). However, it is still unclear whether this relationship is causal or simply a surrogate marker of other risk factors commonly associated with AF.

**Purpose:** The purpose of this study was to assess the relationship between these factors and EAT, and to compare their performance in predicting AF recurrence after an ablation procedure.

**Methods:** We assessed 575 consecutive patients (mean age 61±11 years, 62% male) undergoing AF ablation preceded by cardiac CT in a high-volume ablation center. EAT was measured on cardiac CT using a modified simplified method. Patients were divided into 2 groups (above vs. below the median EAT volume). Cox regression was used to assess the relationship between epicardial fat, risk factors, and AF relapse.

**Results:** Patients with above-median EAT volume were older ( $p<0.001$ ), more often male (OR 1.7,  $p=0.002$ ), had higher body mass index, and higher prevalence of smoking, hypertension, diabetes and dyslipidemia

( $p<0.05$ ). Non-paroxysmal AF was also more common in those with above-median EAT volume. During a median follow-up of 18 months, 232 patients (40.3%) suffered AF recurrence. After adjustment for BMI and other univariate predictors of relapse, three variables emerged independently associated with time to AF recurrence: non-paroxysmal AF (HR 2.1, 95% CI: 1.5–2.7,  $p<0.001$ ), indexed left atrial (LA) volume (HR 1.006 per mL/m<sup>2</sup>, 95% CI: 1.002–1.011,  $p<0.001$ ), and indexed epicardial fat volume (HR 1.87 per mL/m<sup>2</sup>, 95% CI: 1.66–2.1,  $p<0.001$ ). None of the classic cardiovascular risk factors were an independent predictor of AF recurrence (all  $p>0.10$ ).

**Conclusion:** Classic cardiovascular risk factors are more prevalent in patients with higher amounts of epicardial fat. However, unlike these risk factors, EAT is a powerful predictor of AF recurrence after ablation. These findings suggest that EAT is not merely a surrogate marker, but an important participant in the pathophysiology of AF.

Baseline characteristics of our population

|                          | < Median EATVol | > Median EATVol | OR (CI95%)    | p-value |
|--------------------------|-----------------|-----------------|---------------|---------|
| Age (years)              | 58.6±12.3       | 64.1±9.4        | -             | <0.001  |
| Gender (♂)               | 55.4%           | 67.7%           | 1.7 (1.2-2.4) | 0.002   |
| BMI (Kg/m <sup>2</sup> ) | 26.8±4.0        | 29.3±4.0        | -             | <0.001  |
| Smoking                  | 19.2%           | 30.2%           | 1.8 (1.2-2.7) | 0.002   |
| Hypertension             | 51.9%           | 70.5%           | 2.2 (1.6-3.1) | <0.001  |
| Diabetes                 | 7.3%            | 13.5%           | 2.0 (1.1-3.5) | 0.015   |
| Dyslipidaemia            | 41.8%           | 56.9%           | 1.8 (1.3-2.6) | <0.001  |
| Obesity (BMI>30)         | 21.6%           | 41.8%           | 2.6 (1.8-3.8) | <0.001  |
| Non-paroxysmal AF        | 17.1%           | 26.7%           | 1.8 (1.2-2.7) | 0.005   |

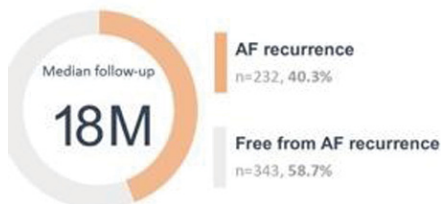

Multivariate analysis for AF recurrence (Cox)

|                           | HR (CI 95%)         | P-value |
|---------------------------|---------------------|---------|
| non-paroxysmal AF         | 2.1 (1.5-2.7)       | <0.001  |
| indexed LA volume         | 1.006 (1.002-1.011) | <0.001  |
| epicardial fat volume/BSA | 1.87 (1.66-2.1)     | <0.001  |

\*none of the classic cardiovascular risk factors were an independent predictor of AF recurrence over time (all  $p>0.10$ )

COX regression for AF recurrence over time

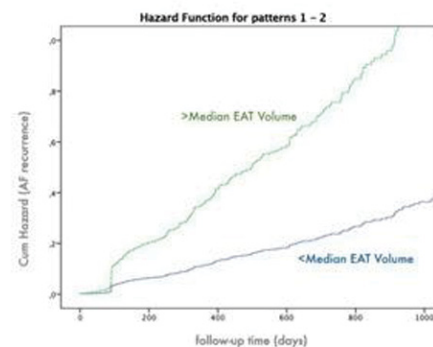

EAT, cvrf and AF burden
